# Supplementary material
Source: bioRxiv or medRxiv preprint supplement (https://www.biorxiv.org/highwire/filestream/32095/field_highwire_adjunct_files/10/094060-2.pdf)

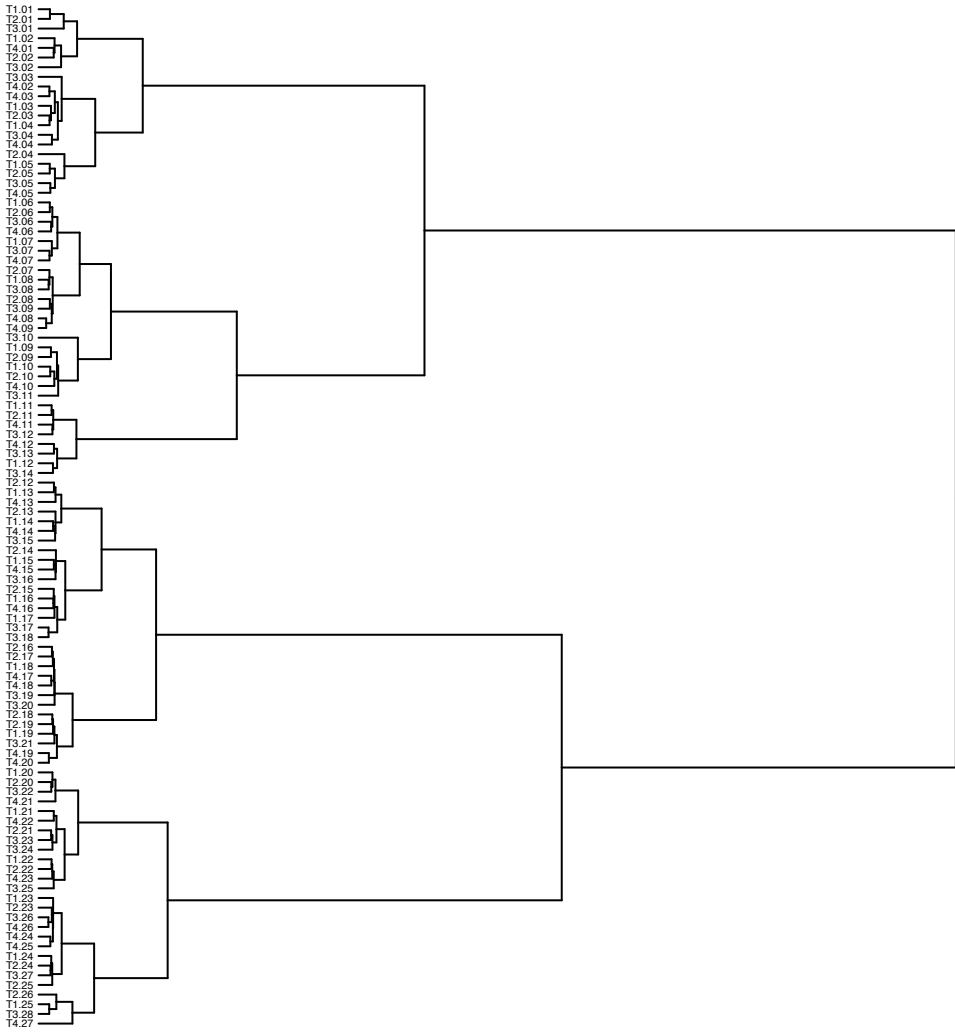

Supplement: Supplementary file [file 094060-2.pdf]
